# Supplementary material for: Effects of foliar fertilizer application on the growth and fruit quality of commercial melon varieties grown in a soilless culture system
Source: PeerJ. 2023 Feb 21;11:e14900. doi: 10.7717/peerj.14900 (PMC9951807; doi:10.7717/peerj.14900)
Supplement: Supplemental Information 1 — Plant growth, fruit growth, and fruit analysis of melons. [file peerj-11-14900-s001.xlsx]

## Sheet: Growth
trt	blk	sam	a	b	Foliar	Stem diameter1	Stem diameter2	Stem diameter3	Stem diameter4	Stem diameter5	Stem length1	Stem length2	Stem length3	Stem length4	Stem length5	Leaf width1	Leaf width2	Leaf width3	Leaf width4	Leaf width5	Leaf length1	Leaf length2	Leaf length3	Leaf length4	Leaf length5	Total leaf number1	Total leaf number2	Total leaf number3	Total leaf number4	Total leaf number5	SPAD1	SPAD2	SPAD3	SPAD4	SPAD5	Day to male flowering	Day to female flowering
V1	1	1	a1	b4	A+M	0.5	1	1	1.2	0.9	7.2	34	130	203	244	9.7	21	25.5	28	30	7.5	19	21.5	24.5	27	4	12	20	28	35	31	38.9	43.7	45.2	42.2	17	25
V1	1	2	a1	b4	A+M	0.4	1.1	1.1	1.1	1	5.9	28	113	198	243	9.5	21.5	24	27	29	8.3	20	21.5	22.5	24	3	10	17	26	33	27.4	42.2	38.2	43.3	45.6	17	26
V1	1	3	a1	b4	A+M	0.5	0.9	1.1	1.1	1	9	39	128	200	250	9.7	22	27	28	28.5	7.6	21	24	23.5	25	3	10	18	26	33	28.4	38.4	40.4	45.5	43.7	15	23
V1	1	4	a1	b4	A+M	0.5	1.1	1	1.1	1	6.5	38	126	205	260	9.9	22	27	28	28.5	7.6	20	23.5	24	25	3	10	18	26	33	28.8	43.5	41.3	46.6	41.9	15	25
V1	2	1	a1	b1	C	0.5	1	1	1.1	0.9	6.4	25	123	204	269	9.6	22	27.5	27.5	29	7.7	19	21	23.5	25.5	4	11	19	28	35	26.6	42.7	40.4	42.4	38.1	15	25
V1	2	2	a1	b1	C	0.5	1.1	1.1	1.1	0.9	7.3	41	124	205	248	10.4	23	27.5	27	29	8.2	21	22	25	26	4	12	20	28	34	27	39.7	42.9	43.9	42.1	15	24
V1	2	3	a1	b1	C	0.6	1	0.9	1.1	0.9	9	43	130	204	243	9.9	21	27	29	28	8.3	20	24	22.5	27	4	11	19	27	33	32.2	38.5	42.7	37.7	41.3	15	23
V1	2	4	a1	b1	C	0.6	1	1	1.1	1	7.7	39	118	196	238	10.3	22.5	25.5	28	28	8.7	21	22	24	25	4	11	19	27	33	30.7	47	42.1	45.1	37.4	17	24
V1	3	1	a1	b2	M	0.5	1.1	0.9	1	0.9	5.4	26	111	182	250	8.2	20	26	27	26.5	8	19.5	23	22.5	23.5	3	9	16	24	31	25.2	42.4	42.1	48.7	39.5	17	25
V1	3	2	a1	b2	M	0.5	1	0.9	0.9	0.9	7.1	26	100	179	275	8	19	23	26	26	7	19	22	23	25	3	9	16	24	32	25.5	39.6	41.5	41.4	34.7	17	27
V1	3	3	a1	b2	M	0.5	1	1.1	1.1	1	7.1	40	138	205	260	9.2	22.5	27.5	27.5	29	8.8	21.5	24.5	25	27.5	3	10	19	27	34	27.6	41	41.9	44.4	42.1	15	25
V1	3	4	a1	b2	M	0.5	1.1	0.9	1.2	0.9	8.6	37	120	184	220	11	20.5	24.5	27	27	8.3	18.5	21	23.5	23.5	4	12	20	28	34	32.7	39.7	40.8	48.4	38.4	17	24
V1	4	1	a1	b3	S+M	0.6	1.2	1	1	0.9	9.1	40	107	163	207	10	22	25	25.5	25	7.9	19	22	23	21.5	4	12	18	25	31	27.5	42	40.8	44.3	41.2	15	23
V1	4	2	a1	b3	S+M	0.5	0.9	1.1	1	1	8.3	37	118	171	210	9.7	21.5	23	23	24	7.9	21.5	21	20.5	23	4	11	20	26	31	28.1	43.5	47.7	44.5	38.1	15	24
V1	4	3	a1	b3	S+M	0.5	1	1.2	1	0.9	7.6	34	110	175	220	9.3	22.5	25	28	24.5	7.7	21.5	22	23	23	4	11	19	26	32	29.3	40.5	42.3	41	35.5	17	25
V1	4	4	a1	b3	S+M	0.4	1	1.2	1	0.9	6.9	31	101	166	224	8.3	21	25	25	26	6.6	19	22	24	25	4	11	17	25	32	28	41.5	40.4	43	41.3	17	25
V2	1	1	a2	b1	C	0.4	1	1.1	1.1	1	8.5	47	140	206	273	9.6	21	27	27.5	28	7.3	19.5	24	24	23.5	4	13	23	34	42	31.9	45.8	39.6	46	41.5	15	24
V2	1	2	a2	b1	C	0.5	0.8	0.9	1	0.9	8.8	33	122	201	253	9.1	18.5	25.5	26.5	27	6.8	16.5	22.5	24	24	4	11	21	31	38	30.4	45.9	41.8	46	44.5	15	24
V2	1	3	a2	b1	C	0.5	1.1	0.9	1.1	1	6.8	42	134	219	270	8.5	20.5	27	30	28	7.5	20	22.5	25	25	4	12	23	34	42	31.3	46.7	42.9	49.8	47	17	24
V2	1	4	a2	b1	C	0.5	1	1	1.1	1	8.2	52	149	222	267	8.9	22	26.5	29.5	28	8	20.5	21.5	25	24	4	13	23	34	41	29.7	46.9	41.1	46.5	41.1	15	23
V2	2	1	a2	b2	M	0.5	0.8	0.8	1	0.8	5.5	36	117	197	240	8.5	18.5	23.5	25.5	24.5	6.9	17	22	19.5	22.5	4	12	20	30	37	32.2	42.9	44.2	45.1	42.9	15	24
V2	2	2	a2	b2	M	0.5	1	1	1	0.9	5.7	43	128	195	224	9	17	23	23	22.5	7.7	20	19.5	19	20	4	12	21	30	38	28.5	40.4	43.6	39.4	37.9	17	26
V2	2	3	a2	b2	M	0.4	0.9	1	1.1	0.8	4.7	41	128	203	220	8.6	20.5	23.5	26	26	7.4	19	21	23	23	4	12	22	31	38	34.3	43.7	42.8	45.4	39.4	15	24
V2	2	4	a2	b2	M	0.4	0.9	1	1.2	1	3.9	30	111	199	240	6.9	18.5	24.5	26.5	27	6.3	17.5	21	21	22.5	4	11	20	30	37	26.3	44	47.1	46.5	41.5	17	26
V2	3	1	a2	b3	S+M	0.5	0.9	1	1.1	1.2	6.5	51	126	180	221	9.3	21	22.5	25	24	7.8	21	20	20	21.5	4	13	22	31	38	29.8	44	41	55.4	44.7	13	23
V2	3	2	a2	b3	S+M	0.5	0.9	1.1	1	0.9	8.4	47	117	173	197	9.1	20.5	22	24.5	24	7.5	19.5	21.5	22	19.7	4	13	22	31	36	28.9	40.7	44.9	44.7	36.7	15	22
V2	3	3	a2	b3	S+M	0.5	1	1.2	1.1	0.9	7.1	50	129	195	249	9.4	21	23.5	25	25	7.2	19.5	20	21.5	22.5	4	13	22	31	39	31.8	42.8	41.2	45.4	43.6	15	24
V2	3	4	a2	b3	S+M	0.5	0.9	1	1	0.9	7.3	43	116	182	230	9.2	21	23	25	23	7.2	19.5	20	21.5	21	4	13	22	30	37	32.2	42.2	43.8	41.8	42.5	13	22
V2	4	1	a2	b4	A+M	0.5	1	1	1	0.8	6.3	41	98	167	229	10.3	17.5	19.5	21.5	22	8	17	16.5	18	21.5	4	13	22	31	41	33	41	40.8	44.1	41.9	15	24
V2	4	2	a2	b4	A+M	0.5	1	0.9	1	0.7	7.2	40	99	152	170	9.9	19	21.5	21	20.5	8	19	19.5	18	18.5	4	13	21	30	37	30	43.5	46.8	49.5	46.9	15	23
V2	4	3	a2	b4	A+M	0.5	0.9	0.9	1.1	0.9	6.6	37	118	186	240	8.2	17	24	24.5	26	6.7	15	20	20.5	20	4	11	20	30	38	33.6	42.3	41.2	46.4	42.7	15	24
V2	4	4	a2	b4	A+M	0.4	1	1.1	1.1	0.9	5.3	29	103	157	210	9.2	20	24	24	24.5	7	19.5	21.5	22.5	23.5	3	10	18	28	35	31.9	42.4	44.3	50.2	48.5	17	25
V3	1	1	a3	b2	M	0.5	0.8	1	1	0.9	6.9	51	140	226	276	9.5	19	25	26	25	7	17	20	23	22	4	11	20	31	38	33.5	40.6	46.1	49.1	43.6	15	22
V3	1	2	a3	b2	M	0.5	0.9	0.9	0.9	0.9	5	57	149	227	280	9.4	18	24	25.5	26	7.3	18	22	22.5	24	3	11	20	30	37	31.2	45.8	49.1	50.7	44	15	24
V3	1	3	a3	b2	M	0.5	1	1	1.1	1	5.3	52	146	242	310	9.7	20	23	25	25.5	7.5	17.5	20	21.5	23	4	13	24	35	44	33.9	42.9	45.2	52.7	45.2	13	24
V3	1	4	a3	b2	M	0.5	1	9.8	1.1	0.9	5.7	48	130	217	266	8.9	20.5	23.5	26	26	7.4	18.5	22	24	23.5	4	12	22	32	39	28.3	42.8	48.3	47.9	44.4	13	23
V3	2	1	a3	b3	S+M	0.4	0.8	0.9	1	0.9	4.7	24	112	192	262	6.2	17.5	23.5	24	25	5.5	16.5	21.5	23.5	23	3	9	18	28	37	31.5	39.1	43.3	45.8	45.8	17	26
V3	2	2	a3	b3	S+M	0.5	0.8	0.8	1	1	5.4	37	118	200	253	8	20	23	24	21	7.3	20.5	20	21	20	3	10	18	28	36	31.1	46.4	45.9	47.5	46.7	13	25
V3	2	3	a3	b3	S+M	0.5	1	0.9	1.1	0.9	4.1	38	126	204	270	7.9	19.5	25.5	26	25	7.1	19.5	20	22	22.5	4	12	21	31	40	33.3	41.3	43.6	51	48.4	17	24
V3	2	4	a3	b3	S+M	0.4	0.9	0.9	1	1	4.8	44	116	193	260	8.8	18	23	26.5	26.5	5.5	16.5	21	21.5	21.5	3	9	16	27	35	31.6	45.8	42.7	49	44.7	15	28
V3	3	1	a3	b4	A+M	0.5	0.9	0.8	1	1	6.9	32	118	186	233	8.9	17.5	22.5	22.5	24	6.9	16.5	19.5	21.5	21.5	4	11	21	30	38	31.5	40.8	41.2	44.3	46.5	15	23
V3	3	2	a3	b4	A+M	0.5	0.9	1	1	0.8	5.9	33	117	181	237	8.6	19.5	21	23.5	23	7	15	18.5	21	20.5	4	12	21	30	38	32.1	43.7	43	45.2	50.5	17	24
V3	3	3	a3	b4	A+M	0.4	0.9	1	1.1	0.8	5.9	38	120	190	230	8	18.5	23.5	24.5	23	6.8	18	21	22	21.5	4	12	21	30	37	29.6	43.3	44.3	44.2	44.9	17	25
V3	3	4	a3	b4	A+M	0.5	0.8	0.9	1	0.8	4.6	42	130	207	250	8.6	19.5	21.5	23.5	24	7.3	17.5	19	21	21	3	9	18	28	36	33.3	46.6	45.5	49	43.5	15	28
V3	4	1	a3	b1	C	0.5	0.9	0.9	1	0.8	5.6	28	110	190	230	7.9	17.5	22.5	22.5	22.5	6	15	18.5	19.5	19.5	4	11	20	30	36	31.6	42.1	45.3	43.9	42.3	15	25
V3	4	2	a3	b1	C	0.5	1	1	1.1	0.9	5.2	36	110	181	246	9.1	20.5	22.5	22.5	21	7.3	19	19	20.5	20.5	4	12	21	31	38	32.3	44.2	44.8	46.5	41.3	15	23
V3	4	3	a3	b1	C	0.5	0.8	0.8	0.9	0.8	6.4	35	110	174	202	9.3	17	22	23	24	6.9	15	18.5	20.5	20.5	4	11	20	29	35	32.8	43.9	46.3	41.4	43.4	15	25
V3	4	4	a3	b1	C	0.5	0.9	0.9	1	0.8	7	49	119	180	220	10	18	22.5	23.5	23.5	7.1	17.5	19.5	20	20	4	12	21	31	37	33.1	42.6	43.9	42.5	34.8	15	24
V4	1	1	a4	b3	S+M	0.5	0.9	1.2	1.2	1.1	4.9	47	141	227	262	9.2	20.5	25	27	28	6.6	16.5	23	20	23.5	4	12	22	31	39	30.2	49.3	46.9	48.4	49.2	15	24
V4	1	2	a4	b3	S+M	0.4	0.9	1	1.1	1	4.3	42	134	224	265	8.7	18.5	24	27.5	24	6.4	18	22	25	23	4	12	22	32	40	30.5	48.6	46	64.8	47.2	17	25
V4	1	3	a4	b3	S+M	0.5	0.9	0.9	1.2	1	4.9	40	140	222	279	8.6	19.5	24.5	25	26.5	6.6	18.5	21	22.5	23	3	10	20	30	39	29.3	45.2	45.9	52.4	48.1	17	25
V4	1	4	a4	b3	S+M	0.5	0.9	1	1.1	1.1	6.9	54	154	222	330	9	23	24.5	26.5	28	7.9	20	22.5	25.5	25.5	3	11	21	32	41	31.3	44.6	46.2	54.3	46.4	15	24
V4	2	1	a4	b4	A+M	0.4	0.9	1	1.1	0.9	5.3	38	129	205	237	9.5	20.5	23.5	25	23.5	7	19	19.5	21	21	3	11	21	29	36	33.4	49	43.7	46.3	40.9	17	24
V4	2	2	a4	b4	A+M	0.5	1	1.2	1.2	0.9	4.4	38	138	214	280	9	20	24	27	27	7.3	18.5	22.5	25	25	3	10	20	30	39	33	51.5	44.5	44.8	51.3	17	25
V4	2	3	a4	b4	A+M	0.5	0.8	1	1.1	0.9	8.1	55	149	230	263	9.1	20.5	25	27	21.5	7.5	20	21.5	22.5	22.5	3	11	21	31	39	30.8	49.3	47.6	51.4	48.5	15	24
V4	2	4	a4	b4	A+M	0.5	0.9	1	1.1	0.9	8.5	57	155	236	289	10.2	20	25	26.5	27.5	7.4	18.5	22.5	22.5	23.5	4	13	23	33	42	30.4	47.2	46.2	54.6	47.3	15	24
V4	3	1	a4	b1	C	0.5	0.7	0.9	1.1	0.8	9.2	38	129	218	262	9.5	17.5	23	26	26.5	7.5	16	20	22	22	4	11	20	30	37	31.9	52.1	44.3	47.3	41.7	17	25
V4	3	2	a4	b1	C	0.5	0.9	0.9	1	0.9	8.5	39	121	189	259	9.2	18.5	20.5	23	23	6.9	16	19.5	22	21.5	4	12	20	29	37	33.5	44.5	44.6	48.7	46.4	17	28
V4	3	3	a4	b1	C	0.5	1	0.7	1	0.9	4.6	31	123	201	263	7.1	18.5	25	26.5	25	5.6	17	23	22.5	21.5	3	9	18	28	37	32.1	48.3	46.3	47.9	45.7	17	27
V4	3	4	a4	b1	C	0.5	0.9	1	1.1	0.8	6.9	48	140	204	236	9	20	24.1	25.5	26	7.6	18.5	21	21.5	22	3	11	21	30	35	29.8	46.2	41.1	45.7	38.8	15	25
V4	4	1	a4	b2	M	0.4	0.8	0.9	1	0.8	5.9	34	110	180	230	7.7	17.5	22	21.5	22.5	5.4	18.5	19.5	18	18.5	3	10	18	27	34	32	49.1	44.4	46.6	42.3	17	25
V4	4	2	a4	b2	M	0.5	0.9	0.8	1.1	0.8	5.7	34	117	185	226	7.5	19.5	22	23	23.5	6	16.5	19.5	21	21	3	10	19	27	34	31.9	48.7	40.3	49.6	43.4	17	25
V4	4	3	a4	b2	M	0.4	0.9	0.9	1.1	0.8	5.2	18	104	174	220	6.4	16.5	23	22	21.5	5.1	15	20	20.5	21	3	9	16	25	32	28.1	44.3	42.7	46.5	43.2	17	28
V4	4	4	a4	b2	M	0.6	0.9	0.9	0.9	0.9	8.2	34	113	188	235	7.8	19	22	22	23	6.7	16.5	20	20	21	3	10	18	27	35	29	45.2	40.4	45.6	42.4	13	24
V5	1	1	a5	b4	A+M	0.5	0.8	1.1	1.1	0.9	6.1	32	10.7	180	225	8.9	19	25.5	27.5	25	7.8	17	20	21	22	3	10	19	28	36	30.4	43	41.8	45.4	46.8	17	24
V5	1	2	a5	b4	A+M	0.5	0.9	1.1	1.1	0.9	5	29	100	165	213	8.9	20	24.5	25.5	23.5	7	17.5	20	19.5	20.5	3	10	18	27	34	30.6	41.9	41.4	44.8	40.5	17	23
V5	1	3	a5	b4	A+M	0.6	0.9	1.1	1	0.9	4.7	40	116	190	220	9.7	20.5	25	26.5	26	8.7	18	21	23.5	23.5	3	10	20	29	37	31.4	45.2	40.2	46.3	44	17	23
V5	1	4	a5	b4	A+M	0.5	1	1.2	1	1	4.5	30	105	181	215	9.5	19	27	26.5	25	8.4	16	23	23	24.5	4	11	20	29	37	29.3	43.7	38.7	44.4	41.7	17	23
V5	2	1	a5	b1	C	0.5	1	1	1.1	1.1	4.6	27	110	190	245	9.5	19.5	27	28	26	7.5	17.5	22	22	23.5	3	10	19	29	37	30.3	43.2	42.2	46.5	36.1	17	24
V5	2	2	a5	b1	C	0.5	0.9	0.9	1	1.1	3.4	31	100	180	244	8.4	18.5	24.5	25	24	7.4	17	21.5	22	22.5	3	10	19	29	35	28.3	40.7	40.2	40.9	37.4	17	23
V5	2	3	a5	b1	C	0.6	1	0.7	1	0.8	4.8	23	92	179	234	8.9	17.5	24	26.5	27	7	16.5	21	24	24.5	3	10	19	29	36	29.4	38.4	39.3	44.8	42.1	17	25
V5	2	4	a5	b1	C	0.4	0.9	0.7	1	0.9	5.8	24	82	168	210	7.8	18.5	23	24	25	6	16.5	21	21	23.5	3	11	19	29	36	32	39.7	41.4	43.8	42.2	17	25
V5	3	1	a5	b2	M	0.5	0.8	0.9	1	1	3.9	20	83	139	194	9.1	16.5	22	24.5	23	5.2	14.5	19	21.5	21	3	9	17	26	34	34.2	42.4	40.7	43.9	34.1	15	24
V5	3	2	a5	b2	M	0.5	1	1	1	0.9	7.1	34	105	157	210	9.1	18	21	23.5	23	7.4	16.5	20	20	22	4	12	21	29	37	34.8	42.9	43.3	42.9	40.3	17	22
V5	3	3	a5	b2	M	0.5	0.8	0.9	1	1	5.9	21	86	153	224	8.2	14.5	21.5	22.5	23	7.2	13	18.5	20.5	20	3	9	17	26	33	32.7	43.5	40.7	44	45.5	17	27
V5	3	4	a5	b2	M	0.5	0.7	0.8	0.9	0.8	6.8	14	62	138	191	8.8	12	20.5	25.5	26	7.5	11	17	22	21	3	7	13	22	29	33.5	38	42.4	46.1	37.5	17	28
V5	4	1	a5	b3	S+M	0.5	1	0.9	1	1	3.1	22	98	155	195	8.8	19.5	21	22.5	21	7	18	20.5	21	20.5	3	9	18	27	33	27.8	45.2	40.8	44.1	39.9	17	24
V5	4	2	a5	b3	S+M	0.5	0.8	1.1	1.1	1	4.8	22	89	150	191	9	18.5	20.5	22.5	21.5	7.5	17.5	18.5	19	19	3	9	17	26	33	27.4	41.8	44.3	44.1	41.5	17	25
V5	4	3	a5	b3	S+M	0.5	0.9	0.9	1	0.7	6.9	31	95	145	179	8.2	20	22	22	22.5	6.6	19.5	18	20	20.5	4	11	20	28	33	32.1	41.8	40.1	43	32.9	17	22
V5	4	4	a5	b3	S+M	0.5	1	0.9	1.1	0.8	7.1	31	99	142	173	9.3	19.5	23	24.5	22.5	7.6	17	21	21	20.5	4	11	19	27	32	37.1	38	39.9	45.6	32.9	17	22
V6	1	1	a6	b1	C	0.5	1.1	1	1.1	0.9	6	24	93	154	207	9.6	21.5	28.5	29	28	7.2	21	24	24	25	3	10	18	27	35	33.4	42.8	42	49.9	44.9	17	25
V6	1	2	a6	b1	C	0.5	1	0.9	1.2	0.9	4.9	17	65	145	215	7.5	20	24.5	25	27	6.8	19.5	23	23	23	3	10	17	26	34	33	43.1	45.7	42.9	41	17	28
V6	1	3	a6	b1	C	0.5	1	0.9	1.1	0.9	6.6	32	107	162	203	10	24	28.5	28.5	29	7.1	20	26	25	25.5	3	10	18	27	34	33.1	46	43.5	47.2	43.4	17	25
V6	1	4	a6	b1	C	0.5	1	0.8	1	0.9	2.8	21	70	154	197	7.5	20	27	26	26.5	6.5	20.5	22.5	23	23	3	10	17	26	34	31.8	42.2	45.9	43.8	41.4	17	29
V6	2	1	a6	b2	M	0.5	0.9	1.1	1.1	1	6.2	22	79	144	187	8.4	21.5	26	25.5	25	6.5	20	24	24	22.5	3	9	17	25	33	27	47	40.4	43.1	43.4	15	26
V6	2	2	a6	b2	M	0.5	0.9	1.1	1.1	0.9	4.1	21	75	152	218	7.1	20.5	26	26	26	5.7	18.5	23.5	22.5	22.5	3	9	16	25	33	26.9	43	44.9	45.7	36.9	17	28
V6	2	3	a6	b2	M	0.5	1	1.1	1.1	1	5.9	21	64	130	180	7.6	20.5	24	27.5	25.5	6.4	19	21.5	23	23.5	3	9	15	23	31	26.4	43.5	42.5	44.3	41.5	17	28
V6	2	4	a6	b2	M	0.4	0.9	1.3	1.1	1.1	3.2	22	69	132	175	8.4	20	24	25.5	25.5	6.3	19	22.5	23	21.5	3	10	17	25	32	31.4	47	41.2	45.9	43.7	17	28
V6	3	1	a6	b3	S+M	0.5	0.9	1.1	1.1	0.9	4.3	19	63	113	146	7.8	20	22	22.5	22.5	6.2	19.5	21	21	21	3	9	15	24	31	28.6	41.7	39.1	53.6	41.6	17	27
V6	3	2	a6	b3	S+M	0.4	1	1.1	1	1	3.6	18	72	134	170	6.9	20	24.5	22.5	24	5.9	19	22.5	20.5	20.5	3	9	16	25	31	31.5	44.3	39.1	44	41.1	17	26
V6	3	3	a6	b3	S+M	0.4	1	1.1	1.2	1	4.2	20	76	140	185	7.8	20.5	20	27	24.5	6	18.5	18	23	21.5	3	9	16	25	30	29.8	42.9	40.9	45.9	40.4	17	25
V6	3	4	a6	b3	S+M	0.5	0.9	1	1.2	1	5.2	21	75	120	156	8.8	21	23.5	23.5	24	6.5	19	20.5	21.5	22.5	4	11	18	26	32	30.5	43.7	44.2	45.1	46	17	26
V6	4	1	a6	b4	A+M	0.5	1	1	1.1	1	4.9	14	60	101	140	9	16.5	24.5	25.5	22.5	7.5	15.5	18.5	19	21	4	10	16	24	31	33.4	44.1	42.8	50.2	43.3	17	26
V6	4	2	a6	b4	A+M	0.5	1	1.2	1.2	1.1	5.2	22	75	125	160	9.9	20	23.5	24	24	7.8	19	20.5	20.5	21	4	11	18	26	33	31.2	43.1	41.5	47.7	44	17	26
V6	4	3	a6	b4	A+M	0.5	1.1	1	1.1	0.8	7.7	29	70	130	173	8.6	19.5	23.5	25	24	7	17.5	21	22	22.5	3	10	17	26	34	30.4	41.6	43.2	44.7	43.3	17	26
V6	4	4	a6	b4	A+M	0.5	1	1.2	1.2	0.9	6.8	28	78	128	240	9.7	22.5	24.5	24.5	26	7.5	21	21	22	20	4	11	18	26	34	32.7	43.1	42.8	44.1	42.7	15	25
V7	1	1	a7	b2	M	0.5	0.9	1	1.1	1	4.7	51	142	225	300	9.6	20.5	23.5	25.5	25.5	7.6	18.5	21	22.5	23.5	4	12	22	31	39	32.2	46.1	44.7	44.6	43.7	15	22
V7	1	2	a7	b2	M	0.5	0.8	0.9	1	0.9	4.9	39	136	212	272	8.5	19	25	25	26	7.4	17.5	22	22	24	4	12	21	30	36	31.5	46.8	40.8	45.4	42.2	15	22
V7	1	3	a7	b2	M	0.4	0.9	0.9	1.1	1	5.2	35	135	229	289	7.5	19.5	26	27	28	5.6	18.5	23	24.5	24.5	3	10	19	28	36	28.2	41.7	48.7	46.5	41.9	17	29
V7	1	4	a7	b2	M	0.5	0.9	0.9	1	1.1	5.1	33	123	198	256	8.7	20	25	28	23	7.6	18.5	21	23.5	21	3	10	18	27	34	33.5	44.6	47.3	56.7	43.9	17	25
V7	2	1	a7	b3	S+M	0.5	0.9	0.8	1.1	1.1	4.4	33	115	185	236	8.9	19	22	24	23	7	17.5	20	20.5	19	3	10	18	27	34	29.4	45.4	45.1	52.8	45.5	17	25
V7	2	2	a7	b3	S+M	0.4	0.8	0.9	0.8	1.2	3.8	28	104	163	212	8	19.5	21	25	21	6.9	17.5	18.5	21.5	17.5	3	10	17	25	33	30.2	45.8	46	59	45.5	17	25
V7	2	3	a7	b3	S+M	0.6	0.9	1	1.2	1.1	5.9	58	150	219	295	9.6	20.3	24.5	26	26	7.5	20	23.5	24	24.5	4	13	22	31	39	30.8	43.2	41.9	50	45.7	15	22
V7	2	4	a7	b3	S+M	0.4	0.8	1.1	1.1	1	3.6	31	128	205	289	8.8	21	26	24.5	23.5	6.9	18.5	22	24	21.5	3	10	19	27	34	30	46.2	46.3	51.2	47.7	17	26
V7	3	1	a7	b4	A+M	0.4	0.9	0.9	1	0.9	4.1	28	120	187	243	7.6	17.5	22	23	23.5	6.9	18	19.5	19.5	21	3	10	20	29	36	33.6	46.9	42.9	51.5	41	17	23
V7	3	2	a7	b4	A+M	0.5	0.9	1	1	1	4.9	25	110	185	249	7.8	17.5	21	23	23	6.9	15	18	20	20.5	3	10	18	27	35	29.6	47.1	44.7	46.8	53.2	17	25
V7	3	3	a7	b4	A+M	0.5	0.8	0.9	1.2	1.2	6.1	38	140	224	270	9	19	25.5	26	26.5	7	17	21.5	21.5	23.5	4	12	22	31	38	31.9	44.1	42.8	46.5	46.7	17	24
V7	3	4	a7	b4	A+M	0.4	0.8	0.9	1.1	1.1	5.6	23	120	218	278	6.9	17.5	24	25.5	25.5	5.5	16	21.5	23.5	23.5	3	10	19	29	37	30.6	44.3	43.4	48.7	40.5	17	25
V7	4	1	a7	b1	C	0.5	0.6	0.8	1	0.7	6	19	103	183	227	6.2	14.5	23.5	24.5	23.5	6.4	13	20	22.5	23	4	10	17	27	33	29.7	42.3	46.6	44.4	44.3	17	29
V7	4	2	a7	b1	C	0.4	0.7	0.8	1	1	6.4	37	122	201	258	8.5	20	22.5	23.5	21.5	6.7	18.5	20	20	20	4	11	18	27	34	29.2	44.3	41.7	46.1	44.5	17	29
V7	4	3	a7	b1	C	0.5	0.9	0.9	1.1	1	5.2	33	123	199	264	8.3	18.5	24.5	25	25.5	7.4	17	20.5	22.5	23	4	11	20	30	37	32.1	43.5	41.8	43.8	42.5	17	23
V7	4	4	a7	b1	C	0.5	1	1.1	1	0.9	6.1	36	119	184	207	8	18	23.5	23.5	23.5	6.5	17	20	21	21.5	4	11	20	29	34	32.7	44.5	41.7	49.8	48.7	17	23
V8	1	1	a8	b3	S+M	0.4	1	1.1	1.2	1.2	6.1	21	59	113	172	6.5	16	22	20.5	18	5.9	16	20.5	19	15	3	10	17	28	37	30.2	40.2	44	52.1	42	17	28
V8	1	2	a8	b3	S+M	0.5	1.1	1.1	1.1	1.1	6.2	25	81	150	203	8.1	19.5	21	23.5	22.5	6.6	19	18	20.5	20	4	11	19	29	38	28.6	43.2	44.6	43.7	39.3	15	26
V8	1	3	a8	b3	S+M	0.5	1.1	1.2	1.1	1.2	4.9	27	90	163	230	7.8	19	21	24	25	6.5	18.5	19.5	20.5	21.5	4	11	20	30	39	30.9	40.8	40	47.1	40.6	17	26
V8	1	4	a8	b3	S+M	0.5	1	1.3	1.2	1.1	5.2	28	90	159	217	8.3	20.5	22.5	24	24	7	19.5	21.5	21	20.5	3	10	19	30	39	29.6	41.7	44	41.4	42	15	24
V8	2	1	a8	b4	A+M	0.5	1	1.1	1.2	0.9	5.7	23	80	148	196	7.6	18.5	22.5	22.5	22.5	7	18.5	18	19	19	3	10	18	27	36	34.4	43	43.5	40.6	42	15	23
V8	2	2	a8	b4	A+M	0.5	1.1	1.1	1.1	1	6.9	24	82	140	180	8.7	18.5	21	22.5	23.5	7.1	16.5	16.5	19	21	4	12	20	29	37	31.1	42.6	44.1	40.6	43.7	15	25
V8	2	3	a8	b4	A+M	0.6	1	1.3	1.2	1.1	8.5	33	94	161	201	9.1	20	24	24	25.5	7.1	18	20	23.5	19.5	4	12	21	31	39	28.8	43.9	42.3	43.4	36	13	23
V8	2	4	a8	b4	A+M	0.6	1.1	1.2	1.2	1	8.2	39	77	140	160	8.2	19	23.5	21	22	7.1	17.5	20	20.5	20	4	13	21	30	37	28.6	40.8	41.3	42.9	41.6	13	24
V8	3	1	a8	b1	C	0.5	1	1.1	1.1	0.9	8.4	24	78	140	190	8.2	16.5	21.5	24	23.5	6.4	15.5	19	22	21.5	4	11	19	28	35	32.5	44.9	42.8	46.3	42.7	13	25
V8	3	2	a8	b1	C	0.5	0.8	1.2	1.2	0.9	6.5	24	73	138	167	7.5	15	22.5	24.5	25	6.2	14	19	22	22	3	9	17	27	33	34.7	39.1	40.5	43.8	41	15	25
V8	3	3	a8	b1	C	0.6	1	0.7	1.1	1	6.9	25	75	145	194	10.2	17	24.5	23.5	24.5	7.9	16.5	20	21.5	20.5	4	12	20	29	37	31.1	42.8	39.4	44.6	41.6	13	25
V8	3	4	a8	b1	C	0.5	1	0.8	1	0.9	9.9	26	90	159	206	9.2	18	23	23.5	24.5	7.6	16.5	19.5	21	22	4	11	19	28	35	31.8	48.9	46.2	45.9	44.8	13	27
V8	4	1	a8	b2	M	0.5	1	1.1	1.1	1	6.5	23	75	141	190	8	18.5	21	22	21.5	6.3	16	19	20.5	19	4	11	19	29	37	33.6	41.9	38.8	46.5	42.5	17	24
V8	4	2	a8	b2	M	0.4	1	1	1.1	1	4.8	20	70	135	170	7.2	14	20	21	22	3.1	14	19	19	20	4	10	17	26	33	38.2	46	43.1	43.6	34.3	17	26
V8	4	3	a8	b2	M	0.5	0.8	1	1	1	8.4	16	64	133	186	8.6	11.5	19.5	21.5	21	7	11.5	17	19	20.5	4	10	17	26	33	33.2	40.4	41	44.8	45	13	29
V8	4	4	a8	b2	M	0.5	1	0.9	1.1	0.9	6.4	20	68	126	170	7.2	15.5	22.5	24.5	22	5.2	14.5	20	20	19	3	9	16	25	33	38.3	42.4	41.9	41.9	41.7	17	29

## Sheet: Fruit growth
trt	blk	sam	a	b	Foliar	Fruit weight1	Fruit weight2	Fruit weight3	Fruit weight4	Fruit weight5	Fruit height1	Fruit height2	Fruit height3	Fruit height4	Fruit height5	Fruit perimeter1	Fruit perimeter2	Fruit perimeter3	Fruit perimeter4	Fruit perimeter5	Fruit diameter1	Fruit diameter2	Fruit diameter3	Fruit diameter4	Fruit diameter5
V1	1	1	a1	b4	A+M	0.5	1.2	1.4	1.5	1.7	10	12.8	13.4	13.8	14	28	39.5	42.5	43.5	45	8.9	12.6	13.5	13.8	14.3
V1	1	2	a1	b4	A+M	0.3	1.1	1.4	1.5	1.7	8	12.1	13.2	13.7	13.9	23.5	38.5	42	43.5	45.5	7.5	12.3	13.4	13.8	14.5
V1	1	3	a1	b4	A+M	0.3	0.7	1.2	1.3	1.5	8	11.4	12.9	13.5	13.5	20	34	39	40.5	42	6.4	10.8	12.4	12.9	13.4
V1	1	4	a1	b4	A+M	0.4	1.1	1.5	1.4	1.8	9	12.4	13.1	13.6	13.9	25	38.5	42.5	43.5	45	8	12.3	13.5	13.8	14.3
V1	2	1	a1	b1	C	0.4	0.9	1.4	1.6	1.7	9	11.5	13	13.7	13.9	25	36.5	42.5	43.5	45	8	11.6	13.5	13.8	14.3
V1	2	2	a1	b1	C	0.4	0.8	1.2	1.3	1.4	8.5	11.5	12.7	13.3	13.4	24	35	40	41	41.5	7.6	11.1	12.7	13	13.2
V1	2	3	a1	b1	C	0.4	0.6	1.2	1.3	1	8.5	10.9	13.1	13.5	12.3	23.5	32	41	42	38	7.5	10.2	13	13.4	12.1
V1	2	4	a1	b1	C	0.4	0.8	1.2	1.3	1.5	8.5	11.5	13	13.3	13.7	23.5	35	40.5	41	42	7.5	11.1	12.9	13	13.4
V1	3	1	a1	b2	M	0.2	0.8	1.2	1.3	1.4	6.5	11.1	12.2	12.4	12.8	19	35	38.5	40	41.5	6	11.1	12.3	12.7	13.2
V1	3	2	a1	b2	M	0.3	1	1.4	1.5	1.6	8.8	12.5	13.5	13.6	13.7	23.5	37.6	41.2	41.8	41.2	7.5	12	13.1	13.3	13.7
V1	3	3	a1	b2	M	0.5	1.1	1.6	1.7	1.9	10	13.3	14.1	14.3	14.7	27	40.5	44	44.5	45.5	8.6	12.9	14	14.2	14.5
V1	3	4	a1	b2	M	0.4	1.1	1.4	1.4	1.6	10	13	14.2	14.2	14.4	24.5	37.5	41	41	42.5	7.8	11.9	13	13	13.5
V1	4	1	a1	b3	S+M	0.4	0.9	1.2	1.3	1.6	8.5	11.3	12.3	12.9	13.1	24	36	39.5	40.5	41.5	7.6	11.5	12.6	12.9	13.2
V1	4	2	a1	b3	S+M	0.4	1.1	1.2	1.3	1.4	10	12.3	12.8	13.1	13.4	29	38.5	40	41	42	9.2	12.3	12.7	13	13.4
V1	4	3	a1	b3	S+M	0.4	1.1	1.3	1.6	1.3	9.5	12.4	13.1	13.4	12.5	27	40	42.5	43.5	40.5	8.6	12.7	13.5	13.8	12.9
V1	4	4	a1	b3	S+M	0.3	0.9	1	1.2	1.4	7.5	10.9	11.8	12.1	12.4	21.5	36.5	39	39	40	6.8	11.6	12.4	12.4	12.7
V2	1	1	a2	b1	C	0.5	1.1	1.5	1.8	2	10.5	13.4	14.8	15.4	15.4	28	38	45.5	41.5	48	8.9	12.1	14.5	13.2	15.3
V2	1	2	a2	b1	C	0.5	0.7	1.6	1.7	1.8	10.5	10.2	14.2	15.3	15.2	28.5	33	43	44	45	9.1	10.5	13.7	14	14.3
V2	1	3	a2	b1	C	0.5	1	1.6	1.7	1.8	10.3	12.4	14.5	15.4	15.4	27.2	37.3	44.5	43.8	46.6	8.6	11.9	14.2	13.9	14.8
V2	1	4	a2	b1	C	0.4	1.2	1.6	1.8	1.8	10	13.7	14.6	15.4	15.5	25	41	45	46	47	8	13	14.3	14.6	15
V2	2	1	a2	b2	M	0.5	1.1	1.3	1.3	1.5	9.5	12.4	13.2	13.6	13.5	26.5	38.5	42	42	44	8.4	12.3	13.4	13.4	14
V2	2	2	a2	b2	M	0.4	1.1	1.3	1.5	1.6	9	12.3	13.2	13.7	14	28	39	42	43	44.5	8.9	12.4	13.4	13.7	14.2
V2	2	3	a2	b2	M	0.5	1.1	1.4	1.5	1.6	10	12.6	14	14	14.1	27.5	37.5	42	43	43.5	8.8	11.9	13.4	13.7	13.8
V2	2	4	a2	b2	M	0.5	1.3	1.5	1.6	1.7	10	13.4	14.4	14.7	14.9	25.5	39	42	43	44	8.1	12.4	13.4	13.7	14
V2	3	1	a2	b3	S+M	0.6	1.1	1.5	1.7	1.8	11	13.2	14.5	15	15.2	28	38	43	43.5	44.5	8.9	12.1	13.7	13.8	14.2
V2	3	2	a2	b3	S+M	0.4	1	1.4	1.4	1.5	8	11.6	12.9	13.8	13.6	24	36.5	41	42	44	7.6	11.6	13	13.4	14
V2	3	3	a2	b3	S+M	0.4	1.3	1.6	1.6	1.8	10.5	13.4	13.9	14.4	14.7	28	40	43.5	44	45	8.9	12.7	13.8	14	14.3
V2	3	4	a2	b3	S+M	0.4	1	1.2	1.5	1.4	9.5	12	13.2	13.4	13.5	24.5	36.5	40.5	41	41.5	7.8	11.6	12.9	13	13.2
V2	4	1	a2	b4	A+M	0.5	1.1	1.5	1.7	1.8	9	11.6	12.7	13.1	13.5	27.5	37.5	42	43	45	8.8	11.9	13.4	13.7	14.3
V2	4	2	a2	b4	A+M	0.4	0.9	1.4	1.6	1.6	9	11.2	12.6	12.8	13.3	25.5	36	39.5	41.5	42	8.1	11.5	12.6	13.2	13.4
V2	4	3	a2	b4	A+M	0.3	0.9	1.4	1.5	1.5	8	11	12.4	12.7	13.1	22.7	35.7	14.2	41.7	42.5	7.2	11.3	12.8	13.3	13.5
V2	4	4	a2	b4	A+M	0.1	0.7	1.2	1.3	1.3	6	10.3	11.9	12.2	12.4	15	33.5	39	40.5	40.5	4.8	10.7	12.4	12.9	12.9
V3	1	1	a3	b2	M	0.5	1.1	1.3	1.5	1.6	10	12.5	13.5	14.4	15.2	28	38.5	41.5	42	43	8.9	12.3	13.2	13.4	13.7
V3	1	2	a3	b2	M	0.6	1.2	1.4	1.5	1.5	10.5	12.6	13.6	14.2	14.2	28.5	39	41.5	41.5	43	9.1	12.4	13.2	13.2	13.7
V3	1	3	a3	b2	M	0.4	1	1.2	1.4	1.6	9.5	12.6	13.8	14.4	14.6	27	36	40	41	42.5	8.6	11.5	12.7	13	13.5
V3	1	4	a3	b2	M	0.4	1	1.3	1.3	1.4	8.5	11.5	12.8	13.1	13.1	25	35.5	39	40.5	40.5	8	11.3	12.4	12.9	12.9
V3	2	1	a3	b3	S+M	0.5	1.3	1.5	1.9	2	10	13.7	14.6	15.1	15.3	27.5	39.5	42.5	43.5	44.5	8.8	12.6	13.5	13.8	14.2
V3	2	2	a3	b3	S+M	0.3	0.9	1.2	1.3	1.4	8	11.5	12.9	13.3	13.5	22	38.7	39.3	40.2	40.8	7	11.3	12.5	12.8	13
V3	2	3	a3	b3	S+M	0.4	0.8	1.1	1.2	1.2	8.5	10.5	12.2	12.6	12.7	24	34	38.5	39	39	7.6	10.8	12.3	12.4	12.4
V3	2	4	a3	b3	S+M	0.1	0.7	1	1	1.2	5.5	10.3	12.1	12.2	12.5	14.5	33.5	37	38	39	4.6	10.7	11.8	12.1	12.4
V3	3	1	a3	b4	A+M	0.3	0.9	1.3	1.6	1.6	7.5	11.3	12.5	13	13.4	22	35	38.5	40.5	41.5	7	11.1	12.3	12.9	13.2
V3	3	2	a3	b4	A+M	0.5	1.3	1.2	1.6	1.8	8.5	11.6	12.5	12.9	13.6	25.5	36	38	41	42	8.1	11.5	12.1	13	13.4
V3	3	3	a3	b4	A+M	0.5	0.9	1.2	1.4	1.5	9	11.5	12.8	13.2	13.6	25.5	35	40	41	42	8.1	11.1	12.7	13	13.4
V3	3	4	a3	b4	A+M	0.5	1	1	1.2	1.3	9.5	11.8	12.2	12.7	12.9	26.5	35.5	37.5	38	38.5	8.4	11.3	11.9	12.1	12.3
V3	4	1	a3	b1	C	0.4	0.9	1.3	1.4	1.5	10	11.8	13.2	13.7	14	27.5	36	41	41.5	42.5	8.8	11.5	13	13.2	13.5
V3	4	2	a3	b1	C	0.4	1	1.2	1.3	1.5	9.7	11.9	12.6	12.7	13	27.3	36.7	39.5	39	40	8.7	11.7	12.6	12.4	12.7
V3	4	3	a3	b1	C	0.5	1.1	1.1	1.2	1.3	10.5	12.2	12.6	12.9	13.3	28.5	37.5	39	39	40.5	9.1	11.9	12.4	12.4	12.9
V3	4	4	a3	b1	C	0.4	1	1.1	1.1	1.2	8.5	11.7	12	12.4	12.8	26	36.5	38.5	39	40	8.3	11.6	12.3	12.4	12.7
V4	1	1	a4	b3	S+M	0.5	1.1	1.7	2	2.1	10	12.7	14.3	15.4	16.2	28	39	45	48	50	8.9	12.4	14.3	15.3	15.9
V4	1	2	a4	b3	S+M	0.6	1.2	1.6	1.8	2.1	9.5	12.3	13.6	14.2	15	28	38	43	44.5	46	8.9	12.1	13.7	14.2	14.6
V4	1	3	a4	b3	S+M	0.6	1	1.4	1.7	1.9	9	11.9	13	14	14.1	28	38	43	45	47.5	8.9	12.1	13.7	14.3	15.1
V4	1	4	a4	b3	S+M	0.6	1.1	1.6	1.8	2	9.5	12.3	13.7	14.5	15.1	28	38.3	43.7	45.8	47.8	8.9	12.2	13.9	14.6	15.2
V4	2	1	a4	b4	A+M	0.5	0.6	1.7	1.8	2	10	10.5	14	14.4	14.9	27.5	32	44	46	48.5	8.8	10.2	14	14.6	15.4
V4	2	2	a4	b4	A+M	0.4	1.3	1.7	1.9	2.3	10	12.9	14.4	15	16.5	26.5	39	44	46	48	8.4	12.4	14	14.6	15.3
V4	2	3	a4	b4	A+M	0.3	1.1	1.5	1.7	1.9	9	11.8	12.9	13.6	14.3	26	38	42	44.5	46	8.3	12.1	13.4	14.2	14.6
V4	2	4	a4	b4	A+M	0.4	1.2	1.6	1.9	2.1	10	12.6	14	14.6	15.2	27	39	43	46	47	8.6	12.4	13.7	14.6	15
V4	3	1	a4	b1	C	0.4	1	1.3	1.5	1.7	9.5	11.8	13.2	13.6	13.8	27	36	41	44	44.5	8.6	11.5	13	14	14.2
V4	3	2	a4	b1	C	0.4	0.9	1.2	1.4	1.6	9	11.7	13	13.3	13.5	26.3	36	40.8	43.3	43.5	8.4	11.5	13	13.8	13.8
V4	3	3	a4	b1	C	0.4	0.9	1.2	1.4	1.6	9	11.7	13	13.3	13.5	26.3	36	40.8	43.3	43.5	8.4	11.5	13	13.8	13.8
V4	3	4	a4	b1	C	0.4	0.8	1.2	1.3	1.6	8.5	11.5	12.7	13	13.3	25.5	36	40.5	42.5	42.5	8.1	11.5	12.9	13.5	13.5
V4	4	1	a4	b2	M	0.5	0.9	1.2	1.3	1.6	9.3	12.3	12.7	13	13.3	26.8	37	40.5	42.5	42.5	8.5	11.8	12.9	13.5	13.5
V4	4	2	a4	b2	M	0.5	1	1.2	1.3	1.6	10	13	12.7	13	13.3	28	38	40.5	42.5	42.5	8.9	12.1	12.9	13.5	13.5
V4	4	3	a4	b2	M	0.5	0.9	1.2	1.3	1.6	9.6	12.6	12.7	13	13.3	27.4	37.5	40.5	42.5	42.5	8.7	11.9	12.9	13.5	13.5
V4	4	4	a4	b2	M	0.5	0.9	1.2	1.3	1.6	9.8	12.8	12.7	13	13.3	27.7	37.8	40.5	42.5	42.5	8.8	12	12.9	13.5	13.5
V5	1	1	a5	b4	A+M	0.5	1.5	2.1	2.3	2.4	10	13.4	14.5	15.1	15.5	29	44.5	50	51.5	52.5	9.2	14.2	15.9	16.4	16.7
V5	1	2	a5	b4	A+M	0.4	1	1.6	1.6	2.2	9	11.7	13.8	14.2	14.3	24.5	36	44	46	51	7.8	11.5	14	14.6	16.2
V5	1	3	a5	b4	A+M	0.4	1	1.4	1.4	1.5	9	11.6	13	13.3	13.7	25.5	37	43	43.5	44.5	8.1	11.8	13.7	13.8	14.2
V5	1	4	a5	b4	A+M	0.5	1.3	1.7	2	2.1	9	12.7	13.9	14.1	14.4	27	40	46	47	48.5	8.6	12.7	14.6	15	15.4
V5	2	1	a5	b1	C	0.5	1	1.5	1.9	1.9	9.9	11.8	13.1	13.8	14	27.8	37.3	43.9	48.3	48.5	8.8	11.9	14	15.4	15.4
V5	2	2	a5	b1	C	0.5	1	1.4	1.9	1.9	9.8	11.8	13	13.9	14.2	27.5	36.5	42.8	48.5	49	8.8	11.6	13.6	15.4	15.6
V5	2	3	a5	b1	C	0.6	1.1	1.6	2	1.9	10	11.9	13.2	13.7	13.9	28	38	45	48	48	8.9	12.1	14.3	15.3	15.3
V5	2	4	a5	b1	C	0.5	0.9	1.1	1.7	2	9.5	11.6	12.8	14	14.5	27	35	40.5	49	50	8.6	11.1	12.9	15.6	15.9
V5	3	1	a5	b2	M	0.4	1.1	1.3	1.4	1.6	9.5	11.9	12.5	12.9	13.1	26.5	38	42	43	44	8.4	12.1	13.4	13.7	14
V5	3	2	a5	b2	M	0.6	1.2	1.4	1.6	1.6	9.5	11.8	12.9	13.4	13.5	28	38	43	45	45.5	8.9	12.1	13.7	14.3	14.5
V5	3	3	a5	b2	M	0.5	1.1	1.4	1.5	1.6	9.5	11.8	12.7	13.2	13.3	27.3	38	42.5	44	44.8	8.7	12.1	13.5	14	14.2
V5	3	4	a5	b2	M	0.5	1.1	1.4	1.6	1.6	9.5	11.8	12.8	13.4	13.4	27.6	38	42.8	44.5	45.1	8.8	12.1	13.6	14.2	14.4
V5	4	1	a5	b3	S+M	0.6	1.1	1.3	1.6	1.6	9	11.2	12.7	13.4	13.5	25	36.5	42	45.5	45	8	11.6	13.4	14.5	14.3
V5	4	2	a5	b3	S+M	0.6	1	1.5	1.5	1.7	10	11.9	12.1	13.2	13.6	27	37	42.5	44	45.5	8.6	11.8	13.5	14	14.5
V5	4	3	a5	b3	S+M	0.5	1	1.5	1.5	1.6	10	11.8	13	13.2	13.3	28.5	38.5	43	44	45.5	9.1	12.3	13.7	14	14.5
V5	4	4	a5	b3	S+M	0.5	1.1	1.4	1.4	1.6	10	11.7	13	13.5	13.2	28	37.5	42	43	44.5	8.9	11.9	13.4	13.7	14.2
V6	1	1	a6	b1	C	0.4	0.9	1.2	1.3	1.3	8	10.6	11.3	11.9	12.2	26	35.5	39	39.5	40	8.3	11.3	12.4	12.6	12.7
V6	1	2	a6	b1	C	0.3	0.9	1	1	1.5	7.5	10.4	10.8	10.9	12.2	22.5	34	36.5	37.5	41	7.2	10.8	11.6	11.9	13
V6	1	3	a6	b1	C	0.4	0.8	1.3	1.4	1.4	8	10.3	11.8	12.3	12.2	23.5	35	40	42	42	7.5	11.1	12.7	13.4	13.4
V6	1	4	a6	b1	C	0.4	1.1	1.2	1.2	1.3	8.5	11.3	11.7	12	12.1	26	37.5	39	39.5	39.5	8.3	11.9	12.4	12.6	12.6
V6	2	1	a6	b2	M	0.4	1	1.1	1.2	1.4	8	10.9	11.4	11.4	11.6	26.5	36.5	38.5	40	40.5	8.4	11.6	12.3	12.7	12.9
V6	2	2	a6	b2	M	0.3	0.7	1	1	1	8	10.3	11	11	11.2	24.5	34	37	31.5	37.5	7.8	10.8	11.8	10	11.9
V6	2	3	a6	b2	M	0.4	0.9	1	1.1	1.2	7.5	10.3	11.1	11.3	11.4	23.5	35.5	39	39	40	7.5	11.3	12.4	12.4	12.7
V6	2	4	a6	b2	M	0.5	0.9	1	1	1.2	7	10.3	10.9	11.1	11.3	22	35	36.5	37.5	37.5	7	11.1	11.6	11.9	11.9
V6	3	1	a6	b3	S+M	0.4	1	1.2	1.1	1.2	8	10.4	10.7	10.5	11.3	27	35	36	37	37	8.6	11.1	11.5	11.8	11.8
V6	3	2	a6	b3	S+M	0.4	1.1	1.5	1.5	1.9	8.5	10.9	11.7	12	12.7	26.5	36.5	39	40.5	41.5	8.4	11.6	12.4	12.9	13.2
V6	3	3	a6	b3	S+M	0.4	0.9	1.1	1.1	1.3	8	10.1	10.8	10.9	11.3	23.5	33.5	36.2	37	37.5	7.5	10.7	11.5	11.8	11.9
V6	3	4	a6	b3	S+M	0.4	0.9	1.2	1.1	1.2	8	10.2	10.8	10.9	11.3	25.5	35	36.5	36.5	38	8.1	11.1	11.6	11.6	12.1
V6	4	1	a6	b4	A+M	0.4	0.9	1.3	1.2	1.3	7	9.9	10.9	10.5	10.7	25.5	33.5	37.5	36	37	8.1	10.7	11.9	11.5	11.8
V6	4	2	a6	b4	A+M	0.4	1	1.2	1.2	1.1	8.2	10.5	11	10.8	11	25.5	34.5	36.7	36.2	36.8	8.1	11	11.7	11.5	11.7
V6	4	3	a6	b4	A+M	0.5	1.2	1.2	1.5	1.1	9	11.5	11.4	11.6	11.7	28	37	38.5	38.5	39	8.9	11.8	12.3	12.3	12.4
V6	4	4	a6	b4	A+M	0.4	0.8	1	1	1	8.5	10	10.5	10.5	10.6	23	33	34	34	34.5	7.3	10.5	10.8	10.8	11
V7	1	1	a7	b2	M	0.5	1.4	1.8	2	2.2	10.7	13.6	14.8	14.9	15.1	27.2	41.3	46.3	48.3	49.7	8.6	13.2	14.7	15.4	15.8
V7	1	2	a7	b2	M	0.5	1.3	1.8	2.1	2.2	11	13.5	15	15.4	15.5	26	39.5	45.5	48	48.5	8.3	12.6	14.5	15.3	15.4
V7	1	3	a7	b2	M	0.6	1.6	2.1	2.3	2.6	11	14.4	15.4	15.4	15.5	28.5	43.5	48.5	51	53	9.1	13.8	15.4	16.2	16.9
V7	1	4	a7	b2	M	0.5	1.4	1.5	1.7	2	10	13	14.1	14	14.3	27	41	45	46	47.5	8.6	13	14.3	14.6	15.1
V7	2	1	a7	b3	S+M	0.4	1.8	2.2	2.5	2.8	9.5	13.3	14.3	14.6	15	25.5	42	48.5	53.5	54.5	8.1	13.4	15.4	17	17.3
V7	2	2	a7	b3	S+M	0.5	1.6	2	2.3	2.5	9.7	13.2	14.3	14.8	15.6	25.8	42	48	50.5	51.3	8.2	13.4	15.3	16.1	16.3
V7	2	3	a7	b3	S+M	0.6	1.6	2.1	2.4	2.6	10	13.3	14.7	15.6	16.4	27	43.5	50	51.5	52.5	8.6	13.8	15.9	16.4	16.7
V7	2	4	a7	b3	S+M	0.5	1.4	1.6	1.9	2.1	9.5	13.1	14	14.3	15.3	25	40.5	45.5	46.5	47	8	12.9	14.5	14.8	15
V7	3	1	a7	b4	A+M	0.4	1.4	1.8	1.9	2.1	9	12.2	12.9	13.3	13.7	24	38	42.5	45	45.5	7.6	12.1	13.5	14.3	14.5
V7	3	2	a7	b4	A+M	0.6	1.5	2	2.3	2.4	10	13.1	14	14.5	14.7	26.5	42	46.5	47.5	49	8.4	13.4	14.8	15.1	15.6
V7	3	3	a7	b4	A+M	0.5	1.5	2.1	2.2	2.3	10	13.3	14.9	15.3	15.6	28	41	48	50.5	52	8.9	13	15.3	16.1	16.5
V7	3	4	a7	b4	A+M	0.5	1.5	2	2.1	2.3	9.7	12.9	13.9	14.4	14.7	26.2	40.3	45.7	47.7	48.8	8.3	12.8	14.5	15.2	15.5
V7	4	1	a7	b1	C	0.5	1.4	1.6	1.6	1.8	10	13.1	13.9	14.2	14.2	26.5	41	43.5	45.5	46.5	8.4	13	13.8	14.5	14.8
V7	4	2	a7	b1	C	0.3	1	1.5	1.5	1.7	7	12	13	13.4	13.6	17	37.5	41.5	43.5	44	5.4	11.9	13.2	13.8	14
V7	4	3	a7	b1	C	0.4	1.2	1.6	1.5	1.7	8.5	12.6	13.4	13.8	13.9	21.8	39.3	42.5	44.5	45.3	6.9	12.5	13.5	14.2	14.4
V7	4	4	a7	b1	C	0.3	1.1	1.5	1.5	1.7	7.8	12.3	13.2	13.6	13.7	19.4	38.4	42	44	44.6	6.2	12.2	13.4	14	14.2
V8	1	1	a8	b3	S+M	0.4	1	1.2	1.4	1.4	8.5	10.6	11.5	12.1	12.3	25	34	38	39	40.5	8	10.8	12.1	12.4	12.9
V8	1	2	a8	b3	S+M	0.4	1	1.3	1.5	1.6	8.3	11	12.4	12.5	12.7	24.2	34.7	38.7	39.8	41	7.7	11	12.3	12.7	13
V8	1	3	a8	b3	S+M	0.4	1.1	1.7	1.7	1.8	8.5	11.4	12.7	13.1	13.4	24	35.5	40	42	43	7.6	11.3	12.7	13.4	13.7
V8	1	4	a8	b3	S+M	0.4	1	1.2	1.5	1.7	8	10.9	13	12.3	12.4	23.5	34.5	38	38.5	39.5	7.5	11	12.1	12.3	12.6
V8	2	1	a8	b4	A+M	0.3	0.8	1.1	1.3	1.4	7	10.8	11.9	12.9	13	18	34	37	39.5	38.5	5.7	10.8	11.8	12.6	12.3
V8	2	2	a8	b4	A+M	0.4	1.1	1.6	1.8	1.9	9	13	14.2	15.5	16.6	23.5	35.5	40	43.5	45.5	7.5	11.3	12.7	13.8	14.5
V8	2	3	a8	b4	A+M	0.3	1	1.3	1.5	1.7	8.5	11.4	12.6	13.3	13.2	25.5	35	39	41	41.5	8.1	11.1	12.4	13	13.2
V8	2	4	a8	b4	A+M	0.5	1	1.3	1.3	1.3	10	11.2	12.2	12.8	12.7	28	35	38	40.5	42	8.9	11.1	12.1	12.9	13.4
V8	3	1	a8	b1	C	0.4	1	1.2	1.4	1.1	8.8	11.5	12.5	13	11.7	25	34.9	39	40.8	36	8	11.1	12.4	13	11.5
V8	3	2	a8	b1	C	0.4	1	1.2	1.4	1.4	8.5	11	12.5	13.2	13.2	24.5	33.2	38.5	40	41.5	7.8	10.6	12.3	12.7	13.2
V8	3	3	a8	b1	C	0.4	1	1.2	1.4	1.4	8.8	11.5	12.5	13	13.2	25	34.9	39	40.8	42	8	11.1	12.4	13	13.4
V8	3	4	a8	b1	C	0.5	1.1	1.3	1.4	1.5	9	11.9	12.5	12.9	13.2	25.5	36.5	39.5	41.5	42.5	8.1	11.6	12.6	13.2	13.5
V8	4	1	a8	b2	M	0.2	0.7	0.9	0.8	1.1	6.5	9.5	10.1	10.2	10.4	19	30.5	32	33	33	6	9.7	10.2	10.5	10.5
V8	4	2	a8	b2	M	0.3	0.9	1.1	1.1	1.3	7.8	10.7	11.3	11.5	11.8	22.3	33.5	35.8	37.3	37.8	7.1	10.7	11.4	11.9	12
V8	4	3	a8	b2	M	0.2	0.8	1	0.9	1.2	7.1	10.1	10.7	10.9	11.1	20.6	32	33.9	35.1	35.4	6.6	10.2	10.8	11.2	11.3
V8	4	4	a8	b2	M	0.3	0.8	1	1	1.3	7.4	10.4	11	11.2	11.4	21.4	32.8	34.8	36.2	36.6	6.8	10.4	11.1	11.5	11.6

## Sheet: Fruit analysis
trt	a	b	foliar	blk	plant	sam	Fruit cavity	Pulp thickness	Rind thickness	Firmness	TSS	EC	pH	TA (ml)	%TA	L*	a*	b*	hue	hue 2	c*
V1	a1	b4	A+M	1	1	1	5	3.6	0.6	0.6	12.2	7950	7.2	1.5	0.2	57.7	21.2	37.7	33.6	31.4	0.3
V1	a1	b4	A+M	1	1	2	5.7	3.7	0.5	0.5	12.8	7960	7.2	1.6	0.2	53.9	21.7	38.8	30.6	34.8	0.2
V1	a1	b4	A+M	1	1	3	5.3	3.7	0.4	0.5	12.9	7970	7.2	1.7	0.2	59.6	19.7	37.2	32.9	31.1	0.5
V1	a1	b4	A+M	1	2	1	4.4	3.7	0.6	0.8	10.8	6030	6.8	1.2	0.2	64.3	16.7	34.5	31.9	34.3	0.5
V1	a1	b4	A+M	1	2	2	6.1	3.9	0.5	0.9	10.9	6040	6.7	1.1	0.1	61.1	18.7	36.2	30.2	32.6	0.3
V1	a1	b4	A+M	1	2	3	5.9	3.1	0.4	0.8	11	6050	6.8	1.1	0.1	65.6	19.9	38.1	31.1	32.9	0.4
V1	a1	b1	C	2	1	1	5.6	3.2	0.6	1	9.9	7450	6.6	1.3	0.2	59	17	34.7	34.9	37.7	0.6
V1	a1	b1	C	2	1	2	6.1	3.5	0.5	1	10.2	7470	6.6	1.3	0.2	64.2	18.3	36.6	35.4	35.4	0.4
V1	a1	b1	C	2	1	3	5.2	3.4	0.3	1	10.3	7490	6.6	1.4	0.2	64.8	18.9	38.3	36.2	32.7	0.5
V1	a1	b1	C	2	2	1	4.1	3.5	0.5	0.3	11	7220	6.7	1.2	0.2	64.4	19.7	38.2	30.9	31.2	0.5
V1	a1	b1	C	2	2	2	5	3.7	0.3	0.4	11	7250	6.7	1.3	0.2	63.8	21.4	40.5	31.7	26.5	0.3
V1	a1	b1	C	2	2	3	4.7	3	0.3	0.4	11	7260	6.7	1.3	0.2	59.4	18.7	37.6	34	27.7	0.3
V1	a1	b2	M	3	3	1	5.2	4.5	0.6	0.9	8	6470	6.6	1.4	0.2	64.2	19.3	40.4	38.7	32.4	0.2
V1	a1	b2	M	3	3	2	5.6	5.4	0.4	0.9	9	6430	6.6	1.3	0.2	60	16.2	37	38	30.5	0.2
V1	a1	b2	M	3	3	3	5.3	4.9	0.3	0.9	8	6420	6.6	1.3	0.2	64	17.1	37.5	37.9	31.2	0.3
V1	a1	b2	M	3	4	1	3.8	5	0.4	0.6	6.9	5460	6.9	0.8	0.1	64.4	15	30.3	28.7	32.1	0.4
V1	a1	b2	M	3	4	2	4.3	4.7	0.5	0.5	6.9	5470	6.9	0.7	0.1	68.5	17.2	34.3	29.7	29.5	0.1
V1	a1	b2	M	3	4	3	3.5	4.2	0.3	0.4	6.8	5480	6.9	0.8	0.1	67.2	17.4	34.4	28.8	30.4	0.2
V1	a1	b3	S+M	4	3	1	3.2	4.2	0.5	0.6	9.2	6030	7	1.2	0.2	59.7	21.6	38.3	28.3	28.4	0.4
V1	a1	b3	S+M	4	3	2	4.1	4.3	0.4	0.7	9.3	6020	7	1.2	0.2	59.1	20.3	35.6	26.5	26.5	0.3
V1	a1	b3	S+M	4	3	3	4	3.7	0.3	0.6	9.1	6020	7	1.1	0.1	59.6	21.1	39.8	29.3	32.1	0.5
V1	a1	b3	S+M	4	2	1	3.6	3.5	0.6	0.5	9.9	5740	6.8	1	0.1	65.8	17.3	35.6	33.4	31.9	0.6
V1	a1	b3	S+M	4	2	2	4.9	4	0.5	0.6	9.9	5750	6.8	1	0.1	63.8	17.2	34.7	29.6	30.4	0.2
V1	a1	b3	S+M	4	2	3	4.3	3.3	0.3	0.5	10	5760	6.8	1	0.1	64.5	16.2	33.8	31.9	27.6	0.3
V2	a2	b1	C	1	1	1	5	3.2	0.6	0.8	8.2	6460	7	1	0.1	62.3	18.4	39.2	30.6	35.1	0.5
V2	a2	b1	C	1	1	2	5.7	4	0.8	0.7	8.2	6430	7	1	0.1	61.9	19.8	38.9	31.2	31.1	0.2
V2	a2	b1	C	1	1	3	5.4	3.6	0.6	0.8	8.2	6460	7	1	0.1	61.2	17.1	37.3	32	33.6	0.5
V2	a2	b1	C	1	1	1	5	3.2	0.6	0.8	8.2	6460	7	1	0.1	62.3	18.4	39.2	30.6	32.4	0.3
V2	a2	b1	C	1	1	2	5.7	4	0.8	0.7	8.2	6430	7	1	0.1	61.9	19.8	38.9	31.2	29.5	0.1
V2	a2	b1	C	1	1	3	5.4	3.6	0.6	0.8	8.2	6460	7	1	0.1	61.2	17.1	37.3	32	32.1	0.6
V2	a2	b2	M	2	1	1	4.6	2.9	0.5	0.8	7.2	6020	6.9	1	0.1	67.4	20.9	39.5	34.9	35.3	0.5
V2	a2	b2	M	2	1	2	5.2	3.8	0.4	0.6	7.2	6030	6.9	1.1	0.1	66.4	18.1	38	34.3	28.1	0.2
V2	a2	b2	M	2	1	3	5	3.2	0.3	0.8	8	6030	6.9	1.1	0.1	65.6	21.7	40.3	31.8	31.8	0.6
V2	a2	b2	M	2	2	1	4.5	3.4	0.5	0.7	7.9	6810	6.8	1	0.1	66.7	20.5	39.7	34.2	32.8	0.6
V2	a2	b2	M	2	2	2	5.2	3.9	0.4	0.8	8	5800	6.8	1	0.1	65.9	21.5	40.9	30.5	30.4	0.2
V2	a2	b2	M	2	2	3	4.9	3.5	0.4	0.7	8	5810	6.8	1	0.1	63.3	18	37.6	34.2	34.8	0.4
V2	a2	b3	S+M	3	2	1	5.6	3.1	0.4	1.3	10	6650	6.6	1.5	0.2	62.3	16.9	37.1	41	29.2	0.3
V2	a2	b3	S+M	3	2	2	6.1	3.6	0.4	1.2	10.3	6640	6.6	1.4	0.2	57.2	13.8	32.8	41.5	26.5	0.2
V2	a2	b3	S+M	3	2	3	5.2	3.4	0.3	1.2	10.2	6650	6.6	1.4	0.2	65.8	20.9	41.8	41.2	31.9	0.6
V2	a2	b3	S+M	3	4	1	4.4	3.8	0.5	1.3	10	6470	6.6	1.3	0.2	63	17.9	39.2	39.8	30.3	0.5
V2	a2	b3	S+M	3	4	2	5	4.1	0.5	1.4	10	6480	6.6	1.3	0.2	63.7	19.6	38.3	40.6	26.5	0.2
V2	a2	b3	S+M	3	4	3	4.5	3.4	0.3	1.3	9.5	6470	6.6	1.3	0.2	61	17.6	37	42.1	29.9	0.2
V2	a2	b4	A+M	4	2	1	4	3.2	0.5	0.9	11.5	5640	6.8	1.2	0.2	60	19.6	40.5	44.3	30.5	0.3
V2	a2	b4	A+M	4	2	2	5.2	3.4	0.4	1	11	5660	6.8	1.1	0.1	57.6	19	39.9	41.2	26.5	0.3
V2	a2	b4	A+M	4	2	3	4.5	3.6	0.3	0.9	11	5690	6.8	1.2	0.2	60.4	18.8	39.6	43.3	30.1	0.5
V2	a2	b4	A+M	4	1	1	5.6	3.2	0.6	1.1	13	7300	7	1.5	0.2	67.3	21.8	41.1	30.5	30.2	0.4
V2	a2	b4	A+M	4	1	2	6	3.5	0.5	1.2	13.1	7290	6.9	1.6	0.2	64.2	20.6	40.3	26.5	26.5	0.2
V2	a2	b4	A+M	4	1	3	5	3.6	0.5	1.4	13.2	7270	6.9	1.4	0.2	65.8	22.4	41.5	30.2	31.1	0.4
V3	a3	b2	M	1	4	1	4.3	3.2	0.5	1.2	11	6610	6.5	1.5	0.2	63.6	21.5	43.5	44	34.6	0.5
V3	a3	b2	M	1	4	2	5	3.6	0.3	1.3	11.2	6620	6.5	1.5	0.2	63.1	22.3	42.2	44.6	40.5	0.1
V3	a3	b2	M	1	4	3	4.8	3	0.3	1	11.1	6610	6.5	1.5	0.2	60.5	22.7	43.4	42.3	31.3	0.5
V3	a3	b2	M	1	3	1	4.3	3	0.4	1	12.3	7740	7.1	1.8	0.2	65.3	21.5	40.2	30.1	31.4	0.6
V3	a3	b2	M	1	3	2	5	3.5	0.3	1.3	12.3	7740	7.1	1.7	0.2	65.1	21.1	40.8	30.4	30.1	0.2
V3	a3	b2	M	1	3	3	4.5	3.5	0.3	1	12	7730	7.1	1.7	0.2	65	23	41.8	31.7	33	0.3
V3	a3	b3	S+M	2	1	1	5	3.2	0.5	0.9	11.5	6810	7.4	1.1	0.1	64.2	21	38.4	31.4	30.7	0.3
V3	a3	b3	S+M	2	1	2	5.6	3.4	0.4	1	1.2	6820	7.4	1.2	0.2	60.8	21.6	38	30.1	31.2	0.5
V3	a3	b3	S+M	2	1	3	5.2	3.5	0.3	1	1.9	6800	7.4	1.1	0.1	62.4	22.1	39.8	31.6	30.3	0.5
V3	a3	b3	S+M	2	3	1	4	2.9	0.5	1.1	9	6020	7.2	1.2	0.2	63.7	21.4	40.3	34.8	30.2	0.5
V3	a3	b3	S+M	2	3	2	4.2	3.3	0.3	1	9.1	6030	7.2	1.2	0.2	62.9	21.4	42	33	32.2	0.4
V3	a3	b3	S+M	2	3	3	3.6	3	0.2	1.1	9	6030	7.2	1.1	0.1	61.9	20.3	40.4	34.6	33.8	0.4
V3	a3	b4	A+M	3	3	1	5	3	0.5	1.5	11.2	7320	7	1.5	0.2	64.3	22.5	41.2	31.6	32.6	0.5
V3	a3	b4	A+M	3	3	2	5.5	3.4	0.4	1.3	12	7330	7	1.5	0.2	64.3	21.1	39.6	32.7	28.2	0.2
V3	a3	b4	A+M	3	3	3	5.5	3.1	0.3	1.4	11.9	7320	7	1.5	0.2	62.9	20.7	39.3	35	29.2	0.5
V3	a3	b4	A+M	3	4	1	4	3.2	0.4	1.6	13	7040	7.2	1.9	0.2	58.7	22.4	39.1	34.5	30.6	0.5
V3	a3	b4	A+M	3	4	2	5	3.5	0.3	1.1	13.2	7040	7.1	1.9	0.2	62.2	22.3	40.9	32.1	29.3	0.2
V3	a3	b4	A+M	3	4	3	4.3	2.9	0.3	1.3	13.2	7050	7.1	1.8	0.2	56.5	20.1	36.4	35.1	31.3	0.3
V3	a3	b1	C	4	3	1	4.9	3.1	0.5	1	8.6	7020	7.1	1	0.1	66.4	21.5	38.2	31.6	28.9	0.6
V3	a3	b1	C	4	3	2	5.2	3.2	0.3	0.9	8.7	7060	7.1	1.2	0.2	66.3	21.9	38.6	29.4	30.4	0.3
V3	a3	b1	C	4	3	3	5	2.9	0.3	0.9	8.6	7082	7.1	1.3	0.2	65.1	20.5	38	33.5	32.5	0.5
V3	a3	b1	C	4	1	1	4.5	3	0.6	0.9	7.1	6120	7.2	1	0.1	64	21.7	38.7	30.8	32.7	0.5
V3	a3	b1	C	4	1	2	6	3.4	0.8	0.7	7.2	6120	7	1	0.1	63.6	22.3	40.8	30.2	31.8	0.3
V3	a3	b1	C	4	1	3	5.7	3	0.5	0.8	7.2	6110	7	1	0.1	62.1	20.3	37	30.8	30.6	0.5
V4	a4	b3	S+M	1	4	1	5	3.9	0.7	1	10	6490	7.1	1.5	0.2	63.7	22.1	39.5	45.1	35.4	0.5
V4	a4	b3	S+M	1	4	2	5.9	4	0.4	1	11.1	6440	7.1	1.5	0.2	62.2	22.6	41	44	30.4	0.2
V4	a4	b3	S+M	1	4	3	4.9	3.7	0.4	1.1	11.1	6530	7.1	1.5	0.2	66.4	21.1	40.1	45.4	31.9	0.4
V4	a4	b3	S+M	1	2	1	4.5	4	0.7	0.8	11.4	6300	7.1	1.7	0.2	59.5	22.8	41.5	31.2	29.5	0.7
V4	a4	b3	S+M	1	2	2	5.2	4.5	0.6	0.5	11.5	6310	7.1	1.6	0.2	58.5	20.6	37.8	30.7	28.4	0.2
V4	a4	b3	S+M	1	2	3	5.5	4	0.6	0.4	11.8	6290	7.1	1.7	0.2	65.5	22.1	39.5	32.8	32.5	0.5
V4	a4	b4	A+M	2	1	1	5	4	0.6	1	10.2	6120	6.6	1.3	0.2	65.5	20.5	38.1	28.6	28.7	0.2
V4	a4	b4	A+M	2	1	2	6	4.4	0.6	1	10.1	6140	6.7	1.4	0.2	61.6	19	34.7	33	31.8	0.5
V4	a4	b4	A+M	2	1	3	5.2	3.9	0.4	1	10.2	6140	6.7	1.4	0.2	60.5	17.8	33.8	29.6	32.5	0.5
V4	a4	b4	A+M	2	3	1	5.1	3.5	0.7	1	13	6600	6.9	1.6	0.2	67.7	22.6	42.3	33.6	33.3	0.5
V4	a4	b4	A+M	2	3	2	5.5	4	0.6	0.9	13.2	6610	6.9	1.7	0.2	66.1	19.9	40.1	34.1	32.1	0.2
V4	a4	b4	A+M	2	3	3	5.6	3.4	0.5	1	13.2	6620	6.9	1.7	0.2	59.2	18.3	36.4	31.8	34	0.4
V4	a4	b1	C	3	1	1	4.8	3.2	0.9	0.8	7.2	6440	6.5	1.1	0.1	66.4	21.1	40	45.2	33.9	0.4
V4	a4	b1	C	3	1	2	5.5	3.6	0.7	0.9	7.8	6460	6.5	1.2	0.2	64.2	21.3	35.9	44.8	44.3	0.2
V4	a4	b1	C	3	1	3	5.7	2.9	0.5	0.6	7.9	6490	6.6	1.1	0.1	66.8	21.5	36.8	42.7	31.1	0.5
V4	a4	b1	C	3	4	1	4.5	3.2	0.6	0.4	8	6010	7	1.1	0.1	64.8	20	34.9	28.5	33.9	0.4
V4	a4	b1	C	3	4	2	5.6	3.7	0.6	0.6	8.1	6020	7.1	1	0.1	63.2	20.9	36.3	28.4	44.3	0.2
V4	a4	b1	C	3	4	3	4.6	3.6	0.5	0.5	7.9	6030	7.1	1	0.1	58.1	18.4	34	26.5	31.1	0.5
V4	a4	b2	M	4	4	1	3.5	3.7	0.7	0.9	8.1	5680	7.1	1	0.1	65.2	21.4	38.5	34.2	31.7	0.6
V4	a4	b2	M	4	4	2	4.5	4.2	0.6	0.9	8	5680	7.1	1	0.1	19.4	19.4	36.1	31.2	30.2	0.3
V4	a4	b2	M	4	4	3	3.7	3.5	0.4	0.8	8	5670	7.1	0.9	0.1	20	20	36.3	32.5	33.2	0.2
V4	a4	b2	M	4	2	1	3.5	3.7	0.7	0.9	8.1	5680	7.1	1	0.1	65.2	21.4	38.5	34.2	31.7	0.6
V4	a4	b2	M	4	2	2	4.5	4.2	0.6	0.9	8	5680	7.1	1	0.1	19.4	19.4	36.1	31.2	30.2	0.3
V4	a4	b2	M	4	2	3	3.7	3.5	0.4	0.8	8	5670	7.1	0.9	0.1	20	20	36.3	32.5	33.2	0.2
V5	a5	b4	A+M	1	2	1	5.6	3.9	0.3	0.9	9	5570	6.5	1.2	0.2	68.6	-6.1	34.7	64.6	55.9	0.3
V5	a5	b4	A+M	1	2	2	6.6	4.8	0.4	0.9	9.5	5580	6.5	1.3	0.2	62	-4.7	28.2	64.8	50.4	0.1
V5	a5	b4	A+M	1	2	3	5.4	4.6	0.5	1	9.1	5590	6.6	1.3	0.2	68.4	-5.4	32	65.3	57.5	0.4
V5	a5	b4	A+M	1	1	1	6.5	4.2	0.5	0.9	6.1	4760	6.6	0.8	0.1	74.1	-6.1	33.1	61.9	56.4	0.3
V5	a5	b4	A+M	1	1	2	7	4.7	0.6	0.9	5.9	4770	6.6	0.9	0.1	72.2	-5.8	31.5	63.2	61.7	0
V5	a5	b4	A+M	1	1	3	5.5	4.2	0.5	0.9	5.9	4780	6.6	1	0.1	72.7	-5.9	32.2	69.8	62.8	0.2
V5	a5	b1	C	2	3	1	5	3.9	0.6	0.9	8	6020	6.6	1.2	0.2	70.9	-5.8	29.7	85.2	58.5	0.2
V5	a5	b1	C	2	3	2	6	4	0.6	0.9	8	6030	6.6	1.2	0.2	73.7	-5.5	29.9	77	66.4	0.2
V5	a5	b1	C	2	3	3	5.9	3.6	0.5	0.8	8.1	6050	6.6	1.2	0.2	70.2	-5.7	29.9	72.3	60.7	0.3
V5	a5	b1	C	2	2	1	4.2	3.5	0.7	1	8	5230	6.5	1.3	0.2	73.7	-5.1	28.6	77	60.6	0.2
V5	a5	b1	C	2	2	2	5.5	3.8	0.7	0.8	8	5240	6.5	1.4	0.2	71.4	-5	25.2	65.9	63.9	0.2
V5	a5	b1	C	2	2	3	5.2	3.3	0.6	0.9	8.1	5250	6.5	1.3	0.2	73.6	-5.6	28.7	76.6	60.2	0.2
V5	a5	b2	M	3	2	1	5.5	3.7	0.4	1	9.9	6380	6.5	1.3	0.2	70.1	-3.7	26.4	65.4	57.4	0.3
V5	a5	b2	M	3	2	2	6.5	3.6	0.3	0.9	8.7	6410	6.5	1.4	0.2	73.5	-4.3	30.7	65.6	61.3	0.2
V5	a5	b2	M	3	2	3	5.6	3.4	0.2	1	9	6420	6.5	1.4	0.2	63.6	-5.2	30.3	66.2	57.3	0.5
V5	a5	b2	M	3	1	1	5	3.7	0.6	0.9	9.1	6420	6.7	1.5	0.2	67.6	-4.8	30.9	69.8	55.7	0.4
V5	a5	b2	M	3	1	2	5.8	3.8	0.4	0.9	9.2	6430	6.7	1.5	0.2	69.1	-4.6	26.9	67	69.8	0.2
V5	a5	b2	M	3	1	3	5.3	3.2	0.4	0.8	9.3	6440	6.7	1.4	0.2	69.9	-4.1	27.7	66.8	63.6	0.2
V5	a5	b3	S+M	4	4	1	5.2	3.5	0.3	0.9	7.5	5670	6.5	1.1	0.1	71.3	-4.8	33	67.2	57.7	0.4
V5	a5	b3	S+M	4	4	2	6	3.7	0.4	0.9	8	5690	6.5	1.2	0.2	67.6	-6.5	32.7	68.7	60.6	0.3
V5	a5	b3	S+M	4	4	3	5.1	3.5	0.4	1	8.5	5710	6.5	1.2	0.2	67.1	-7.2	34.1	68.7	56.8	0.4
V5	a5	b3	S+M	4	3	1	4.6	3.6	0.6	0.7	7.1	5710	6.6	1	0.1	74.3	-5.4	33	71.1	62.7	0.5
V5	a5	b3	S+M	4	3	2	5.9	3.7	0.6	0.8	7.9	5670	6.6	1.1	0.1	68.3	-5.7	31	69.8	55.9	0.1
V5	a5	b3	S+M	4	3	3	5.4	3.1	0.6	0.8	13	5720	6.6	1	0.1	66	-6.2	29.7	71.2	57.1	0.5
V6	a6	b1	C	1	1	1	4.5	3	0.6	0.8	9	6060	6.7	1.8	0.2	70.1	-4.7	29.2	73.3	54.8	0.4
V6	a6	b1	C	1	1	2	5.2	3.2	0.5	0.6	9.1	6070	6.7	1.9	0.2	72.2	-5	30.2	82.9	62.4	0.2
V6	a6	b1	C	1	1	3	5.1	3	0.4	0.5	9.1	6080	6.7	1.8	0.2	72	-4.8	31.6	75.9	60.1	0.3
V6	a6	b1	C	1	2	1	4.5	2.9	0.5	1.1	8	6400	6.5	1.6	0.2	69.2	-5.3	30.6	65.6	56.1	0.3
V6	a6	b1	C	1	2	2	5.5	3.1	0.5	1	8	6410	6.5	1.7	0.2	71	-5.5	32.8	63.5	60.2	0.3
V6	a6	b1	C	1	2	3	4.9	2.8	0.4	1	8.1	6420	6.6	1.7	0.2	69.1	-5.3	31.9	65.1	53.4	0.4
V6	a6	b2	M	2	3	1	3.7	3.2	0.6	1	11	7010	6.5	2	0.3	70	-4.8	31.2	58.6	48.8	0.1
V6	a6	b2	M	2	3	2	4.5	3.4	0.6	0.9	11.2	7020	6.5	2	0.3	68.3	-4.6	29.6	59.8	58.7	0.3
V6	a6	b2	M	2	3	3	4.2	3.1	0.5	1	11.5	7030	6.5	2	0.3	65.6	-4.7	27	62.4	56	0.5
V6	a6	b2	M	2	2	1	3.5	3.3	0.6	1	9	6820	6.5	1.5	0.2	70.7	-5.7	36.1	64.5	53.7	0.3
V6	a6	b2	M	2	2	2	4.5	3.7	0.6	1	9.1	6830	6.5	1.6	0.2	72.8	-6	35.5	61.7	69.8	0.1
V6	a6	b2	M	2	2	3	4	3.4	0.5	1	9.1	6840	6.5	1.7	0.2	71.1	-6.1	34.8	67	64.7	0.2
V6	a6	b3	S+M	3	3	1	4	3	0.7	1	10.5	6840	6.9	2.1	0.3	69	-5.5	34.5	62.4	54.8	0.2
V6	a6	b3	S+M	3	3	2	5	3.1	0.6	1	11.1	6850	6.9	2.1	0.3	68	-5.3	32.5	65.4	63.7	0.3
V6	a6	b3	S+M	3	3	3	4.5	2.9	0.5	0.9	11.1	6870	6.9	2.1	0.3	66.9	-5.6	35	68.1	57.7	0.1
V6	a6	b3	S+M	3	2	1	4.6	3.5	0.4	1	11	6500	6.7	1.6	0.2	68.6	-3.8	31	65.1	54.5	0.4
V6	a6	b3	S+M	3	2	2	5	3.6	0.4	1	11.1	6490	6.7	1.6	0.2	67.3	-4.5	32	66	52.1	0.1
V6	a6	b3	S+M	3	2	3	5.1	3.8	0.3	1	11.1	6480	6.7	1.7	0.2	69.3	-3.5	28.2	65.9	54.8	0.1
V6	a6	b4	A+M	4	2	1	4.2	2.1	0.3	0.8	11.1	6520	6.7	1.5	0.2	69.1	-3.4	36.3	66.2	55.6	0.3
V6	a6	b4	A+M	4	2	2	5.1	2.9	0.4	0.9	11.2	6530	6.7	1.6	0.2	62.5	-4.4	31.6	66.3	58.1	0.3
V6	a6	b4	A+M	4	2	3	5	2.3	0.4	0.9	11.8	6540	6.7	1.6	0.2	68.2	-4.3	33.4	66.4	52.1	0.3
V6	a6	b4	A+M	4	3	1	3	3.5	0.7	1	10.5	6600	6.6	2	0.3	70.3	-5	33.4	88.8	57.5	0.4
V6	a6	b4	A+M	4	3	2	4.5	3.9	0.6	1	10.8	6610	6.6	2	0.3	69	-4.8	32.1	85.9	64.2	0.3
V6	a6	b4	A+M	4	3	3	4	3.5	0.5	1	10.9	6620	6.6	2	0.3	71.1	-5.2	34.4	80.4	57.5	0.5
V7	a7	b2	M	1	4	1	5.5	4.5	0.6	1.4	8	4640	6.4	1.4	0.2	71.8	-5.3	30.2	68	58.6	0.4
V7	a7	b2	M	1	4	2	5.6	4.8	0.6	1.1	8	4650	6.4	1.5	0.2	71.2	-5.4	29.9	63.2	64.5	0.1
V7	a7	b2	M	1	4	3	5.2	4	0.5	1	8.1	4640	6.4	1.4	0.2	69.1	-4.6	24.8	69.8	60.6	0.1
V7	a7	b2	M	1	2	1	4.9	4.1	0.6	1	7	5360	6.2	1.4	0.2	77.6	-4.9	27.7	64.9	61.6	0.2
V7	a7	b2	M	1	2	2	6	4.5	0.5	1.1	7.1	5370	6.2	1.5	0.2	77.3	-5	27.4	67	69.2	0.2
V7	a7	b2	M	1	2	3	5.5	3.9	0.4	1.1	7	5370	6.2	1.4	0.2	74.2	-5.6	27.9	65.9	59.8	0.3
V7	a7	b3	S+M	2	1	1	4.3	4.7	0.7	1.2	6	3470	6.1	1	0.1	73.7	-5.8	29	69.8	69.8	0.3
V7	a7	b3	S+M	2	1	2	5.7	5.2	0.5	1	6.1	3480	6.1	1.1	0.1	74.5	-6.1	30.2	71.3	64.5	0.1
V7	a7	b3	S+M	2	1	3	6.1	4.3	0.5	1	6.1	3490	6.1	1	0.1	75.3	-5.7	32	71.6	57.7	0.3
V7	a7	b3	S+M	2	3	1	4.2	4.7	0.8	1.3	8	4760	6.5	1.2	0.2	69.4	-4.4	22.9	60.6	59.8	0.3
V7	a7	b3	S+M	2	3	2	5.7	4.8	0.7	1	8.2	4770	6.5	1.2	0.2	73.3	-5.1	28.3	63	63.9	0.1
V7	a7	b3	S+M	2	3	3	5.4	4.2	0.6	1.3	8.5	4780	6.5	1.2	0.2	73.5	-4.6	25.7	61	59.2	0.2
V7	a7	b4	A+M	3	3	1	5	4.2	0.7	1.2	12.8	6400	6.9	1.2	0.2	70.7	-4.6	30.3	64.5	44.3	0.1
V7	a7	b4	A+M	3	3	2	6	4.8	0.6	1.1	13	6410	7	1.3	0.2	72.4	-4.4	30.9	62.4	59.2	0.2
V7	a7	b4	A+M	3	3	3	5.9	4	0.6	1	13	6420	7	1.4	0.2	72.8	-3.8	29.2	64.7	50.4	0.2
V7	a7	b4	A+M	3	2	1	4.2	5.2	0.6	0.9	10.8	5510	6.9	1.1	0.1	68.9	-5.5	31.1	65.3	52.1	0.1
V7	a7	b4	A+M	3	2	2	5	5.5	0.5	0.9	11	5530	6.9	1.2	0.2	67.8	-5.6	30.6	59.3	52.1	0.1
V7	a7	b4	A+M	3	2	3	5.5	4.9	0.4	0.9	11.1	5540	6.8	1.1	0.1	73.9	-5.3	32.5	58.8	57.4	0.3
V7	a7	b1	C	4	3	1	4.9	2.5	0.4	1.5	6.1	5330	5.7	1.5	0.2	78.8	-4.9	28.2	69.8	64.9	0.2
V7	a7	b1	C	4	3	2	5.5	2.8	0.5	1.5	6.9	5339	5.8	1.5	0.2	72.6	-5.3	29.7	73.7	69.8	0.1
V7	a7	b1	C	4	3	3	5.4	2.4	0.5	1.4	7.2	5420	5.8	1.6	0.2	75.4	-5.9	31	67.3	61.3	0.2
V7	a7	b1	C	4	4	1	4.9	3.4	0.3	1	5.1	4770	6	1.3	0.2	70.9	-5.3	29.9	65.3	61.3	0.3
V7	a7	b1	C	4	4	2	6.1	3.6	0.3	1	5.2	4760	5.9	1.3	0.2	80.6	-4.1	29.2	66.6	69.8	0.1
V7	a7	b1	C	4	4	3	5.9	2.8	0.4	1	5.1	4750	5.9	1.4	0.2	77.4	-5	29.4	69.8	62.8	0.2
V8	a8	b3	S+M	1	1	1	4.2	2.9	0.5	0.7	8.1	6730	6.2	2	0.3	71.4	-4.8	32.9	65.5	65.1	0.4
V8	a8	b3	S+M	1	1	2	4.9	3.2	0.4	0.8	8.5	6650	6.2	1.9	0.2	64.4	-6.2	34.5	64.2	61.3	0.1
V8	a8	b3	S+M	1	1	3	3.9	2.8	0.3	0.8	8.1	6630	6.2	1.9	0.2	69.7	-5.5	33.7	64.3	63.6	0.4
V8	a8	b3	S+M	1	3	1	4	2.6	0.5	0.7	8	6710	6.3	1.5	0.2	61.8	-5.7	31.3	64.1	62.4	0.5
V8	a8	b3	S+M	1	3	2	5.5	3.2	0.4	0.8	8	6720	6.3	1.5	0.2	69.2	-5.8	33	65.1	64.9	0.1
V8	a8	b3	S+M	1	3	3	3.9	2.7	0.4	0.6	8	6730	6.3	1.5	0.2	72.2	-5.5	34.7	68.3	64.3	0.3
V8	a8	b4	A+M	2	3	1	4.5	3.1	0.5	0.5	11	8270	6.7	1.9	0.2	68.7	-3.7	33.3	69.8	50.4	0.1
V8	a8	b4	A+M	2	3	2	5.4	3.6	0.5	0.7	11.1	8260	6.7	1.8	0.2	67.6	-4.3	33.7	66.8	61.3	0.1
V8	a8	b4	A+M	2	3	3	4.1	3	0.4	0.6	11.2	8270	6.7	1.9	0.2	64.2	-5.8	34.1	61.5	55.8	0.4
V8	a8	b4	A+M	2	2	1	6	3.4	0.4	0.5	5.2	5140	6.2	1.2	0.2	69.8	-6.4	33.2	65.8	58.7	0.3
V8	a8	b4	A+M	2	2	2	7.2	3.5	0.5	0.5	5.3	5150	6.2	1.1	0.1	65.5	-7.3	33.6	69.8	68.2	0.3
V8	a8	b4	A+M	2	2	3	5.7	3	0.5	0.4	5.2	5160	6.2	1.1	0.1	71.2	-6.5	31.1	74.4	65.5	0.2
V8	a8	b1	C	3	2	1	5.2	2.5	0.3	0.6	5	5360	6	1.5	0.2	76.6	-2.9	30	66.9	63.2	0.3
V8	a8	b1	C	3	2	2	6	2.8	0.4	0.5	5.5	5330	6	1.5	0.2	67.6	-5.3	30.5	66.5	62.1	0.2
V8	a8	b1	C	3	2	3	5.5	2.6	0.3	0.4	5.1	5280	6	1.5	0.2	69.7	-3.9	26.6	65.8	61.8	0.3
V8	a8	b1	C	3	1	1	4.2	2.5	0.5	0.5	10.9	8590	6.5	2.5	0.3	68	-6.6	35	78.1	63.6	0.5
V8	a8	b1	C	3	1	2	5	2.7	0.5	0.6	10.9	8600	6.5	2.6	0.3	67.3	-6.2	34	77.5	69.8	0.1
V8	a8	b1	C	3	1	3	4.3	2.2	0.4	0.5	10.9	8610	6.5	2.7	0.3	68.1	-6.5	36.4	76.4	63.1	0.4
V8	a8	b2	M	4	3	1	4.6	3.3	0.5	0.5	5.5	5510	6.5	1.2	0.2	66.1	-6.3	30.7	69.7	61.5	0.4
V8	a8	b2	M	4	3	2	5.1	3.5	0.5	0.7	5.5	5520	6.5	1.3	0.2	68.9	-6.1	33.1	72.9	69.8	0.3
V8	a8	b2	M	4	3	3	4.8	3.2	0.4	0.6	5.5	5530	6.5	1.3	0.2	65.7	-6.2	33	69.8	69.8	0.5
V8	a8	b2	M	4	4	1	4.7	3.5	0.3	0.8	5	5110	6.6	1	0.1	69.6	-5.8	28.4	71.2	64.6	0.4
V8	a8	b2	M	4	4	2	5.2	3.8	0.4	0.8	5	5100	6.5	1.1	0.1	69.2	-5.6	29.7	72	65.6	0.1
V8	a8	b2	M	4	4	3	4.5	3.4	0.3	0.8	5	5090	6.5	1.1	0.1	71.3	-5.4	29.1	69.8	59.7	0.3
